# Supplementary material
Source: PubMed Central journal article supplement (PMC6410799)
Supplement: pnas.1813181116.sapp.pdf [file pnas.1813181116.sapp.pdf]

## **Supplementary Information for:**

### **Processing generates 3' ends of RNA masking transcription termination events in prokaryotes**

Xun Wang<sup>a</sup>, Monford Paul Abishek N<sup>b</sup>, Heung Jin Jeon<sup>b</sup>, Yonho Lee<sup>b</sup>, Jin He<sup>a</sup>, Sankar Adhya<sup>c, 1</sup>, Heon M. Lim<sup>b, 1</sup>

<sup>a</sup> State Key Laboratory of Agricultural Microbiology, College of Life Science and Technology, Huazhong Agricultural University, Wuhan, Hubei 430070, PR China;

<sup>b</sup> Department of Biological Sciences, College of Biological Sciences and Biotechnology, Chungnam National University, Daejeon 305-764, Republic of Korea

<sup>c</sup> Laboratory of Molecular Biology, National Institutes of Health, National Cancer Institute, Bethesda, MD 20892-4264, USA

<sup>1</sup> Correspondence: [adhyas@mail.nih.gov](mailto:adhyas@mail.nih.gov) or [hmlim@cnu.ac.kr](mailto:hmlim@cnu.ac.kr).

#### **This PDF file includes:**

Supplementary Materials and Methods

Fig. S1 and S2

Table S1

References for SI reference citations

## **Supplementary Materials and Methods**

### **Bacterial strains and growth conditions**

Strain MG1655  $\Delta gal$  and the RNase E temperature-sensitive mutant GW20  $\Delta gal$  (W3110 *zce-726::Tn10 rne-1  $\Delta galETKM$* ) were used in this study. Chromosomal deletion strains were generated by deleting the corresponding gene(s) from MG1655 using lambda red-mediated recombination<sup>1-3</sup>. The primers used are listed in Table S1. Cells harboring the described plasmids were grown at 37 °C in LB medium (10 g tryptone, 5 g yeast extract, and 10 g NaCl per liter of water) supplemented with 0.5% (wt/vol) galactose and chloramphenicol (15 µg/ml). The cells were grown to an OD<sub>600</sub> of 0.6 before RNA isolation. Unless indicated, all the chemicals were purchased from Sigma-Aldrich (USA).

### **RNA preparation**

Total RNAs were purified from clarified cell lysates using the Direct-zol™ RNA MiniPrep kit (Zymo Research, USA). To generate the cell lysates,

equal numbers of cells ( $2 \times 10^8$ ) were harvested at an  $OD_{600}$  of 0.6 and resuspended in 50  $\mu$ l protoplasting buffer (15 mM Tris-HCl, pH 8.0; 0.45 M sucrose; and 8 mM EDTA). Five microliters of lysozyme (50 mg/ml) was added, and then the samples were incubated for 5 min at 25 °C. A phenolic detergent (1 ml TRI Reagent; Molecular Research Center, USA) was added, and the mixtures were vortexed for 10 s before incubation for 5 min at 25 °C. The RNAs were then isolated according to the manufacturer's recommendations. and the RNAs were dissolved in 30  $\mu$ l of RNA storage buffer (Ambion, USA). RNA concentrations were determined by measuring the absorbance at 260 nm using a NanoDrop spectrophotometer (Thermo Fisher Scientific, USA).

### **3' RACE assay**

Total RNAs were extracted as described above. RNA ligation was performed at 37 °C for 3 h in a 15  $\mu$ l reaction volume containing 2.5  $\mu$ g of total RNA, 2 nM synthetic RNA oligomer possessing a 5'-phosphate and 3' -inverted deoxythymidine (27-mer; Dharmacon, USA), 5 U of T4 RNA ligase (Ambion, USA), and 10 U of rRNasin (Promega, USA). The RNA ligation reaction was applied to a G-50 column (GE healthcare, USA). One microgram of RNA (eluted from the G-50 column) was reverse transcribed at 37 °C for 2 h in a 20- $\mu$ l reaction volume containing 4 U of Omniscript

reverse transcriptase (QIAGEN, Germany), 0.5 mM each dNTP, 0.4 M 3RP primer complementary to the RNA oligomer (see Table S1), and 10 U of rRNasin. A 2- $\mu$ l sample of this reaction was used as the template for PCR amplification of the *gal* cDNA with gene-specific primers and the 3RP primer (see Table S1) using HotStar Taq DNA polymerase (Qiagen, Germany). To assay the 3' ends of the *gal* mRNAs, the amplified cDNAs were purified and used as templates for primer extension reactions performed in a volume of 20  $\mu$ l with  $^{32}$ P-labeled primers (complementary to *galM* of the *gal* operon mRNA; see Table S1) and 1 U of HotStar Taq polymerase. The reaction products were separated on an 8% sequencing gel for 2 h at 60 w, and the radioactive bands were visualized after exposure of X-ray film.

### ***In vitro* transcription**

The *in vitro* transcription was performed as previous described <sup>4</sup>. The pHL1703 plasmid (*pgal-gpmA*) was used as a DNA template for *in vitro* transcription (Supplementary Fig. 1). The *in vitro* transcription reactions were performed using *E. coli*  $\sigma$ 70 (Epicentre, Sweden) according to the manufacturer's instructions. Briefly, DNA templates (2 nM) were incubated at 37 °C for 5 min in reaction buffer (20 mM Tris acetate, pH 7.8; 10 mM magnesium acetate; 200 mM potassium glutamate; 1 mM ATP;

and 1 mM dithiothreitol [DTT]) containing 2 U  $\sigma$  70 and 40 U rRNasin in a 47.5- $\mu$ l reaction. Rho, NusA and NusG were added at the amount indicated in the figure legends. The reactions were initiated by the addition of 2.5  $\mu$ l NTP mix (final concentration, 0.1 mM each NTP) to the mixtures. After 30 min, the reactions were terminated by phenol-chloroform extraction, and then 30  $\mu$ l of supernatants were purified using a G-50 column. The purified RNAs were then utilized for 3' RACE assays as described.

### **Northern blot analysis**

The northern blot analysis was performed as previous described with some modifications.<sup>4</sup> Total RNA was isolated as described above. Total RNAs (10  $\mu$ g with 10  $\mu$ g/ml ethidium bromide) were electrophoresed in 1.2% (wt/vol) formaldehyde-agarose gel electrophoresis at 8 V/cm for 2 h. After electrophoresis, RNA integrities were assessed under UV light, and the RNAs were transferred overnight to a positively charged nylon membrane (Ambion, USA) using a downward transfer system (TurboBlotter; Whatman, UK). The RNAs were then fixed to the nylon membrane by baking at 80 °C for 1 h. The northern blot probe was prepared as follows. First, a 500-bp DNA fragment in the *gale* region (from +27 to +527) was prepared by PCR using primers indicated in Table S1. <sup>32</sup>P-labeled DNA

probes were then produced. Briefly, the template DNA (0.15 pmol) was mixed with random hexamer (4  $\mu$ l of 1 mM) in a total volume of 28  $\mu$ l and then heated at 95 °C for 3 min. Then, the reaction was rapidly cooled for 5 min on ice, and then 5  $\mu$ l 10 $\times$  Klenow fragment buffer, 5  $\mu$ l dNTP mix (0.2 mM dATP, dGTP, and dTTP), 10  $\mu$ l  $\alpha$ -<sup>32</sup>P-dCTP, and 2  $\mu$ l Klenow fragment (2 U/ $\mu$ l) (TAKARA, Japan) were added to the mixture. The reaction was performed by incubation at 37 °C for 1 h, and then the Klenow fragment was inactivated at 65 °C for 5 min (TAKARA, Japan). The product was purified via passage through the G-50 column. The blot was pre-hybridized in 7 ml ULTRAhyb<sup>®</sup> Hybridization Buffer (Ambion, USA) at 65° C for 30 min. The DNA probe was denatured at 95 °C for 5 min, and then 5  $\mu$ l of the probe was added to the hybridization buffer. The hybridization was performed at 42 °C overnight. Then, the blot was washed twice in low-stringency wash buffer (2 $\times$  SSC, 0.1% SDS) for 5 min each at room temperature and then twice in high-stringency wash buffer (0.2 $\times$  SSC, 0.1% SDS) for 15 min each at 42 °C. Finally, the radioactive bands were visualized after exposure to X-ray film.

### ***gal* mutants construction**

The plasmid *pgal-gpmA* was constructed via insertion of the galactose operon and the downstream gene, *gpmA* (from-75 to+5397), between the

*EcoRI* and *BamHI* sites of pCC1BAC (Epicentre, Sweden). The DNA fragment was obtained via PCR amplification of the genomic DNA with the corresponding primer pairs as listed in Table S1. For the construction of the *gal* mutants, primers containing the desired mutations were synthesized. DNA fragments containing the mutations were obtained through PCR amplification. The DNA fragments were used as a “mega primer” for the next round of PCR<sup>5</sup>. The resulting PCR fragments were digested with *MluI* and *BamHI* and then ligated into the plasmid *pgal-gpmA* to generate RIT<sup>o</sup>1, RIT<sup>o</sup>2, RIT<sup>o</sup>3, RIT<sup>o</sup>4, RDT<sup>o</sup>, RDT<sup>o\*</sup>, and the *galM* stop<sup>o</sup>. For the construction of RIT<sup>2</sup>, the DNA fragment containing the *gal* intrinsic terminator sequence was ligated between *BamHI* and *SphI* of pHL1277<sup>4</sup>, generating an intermediate plasmid which was then single-cut with *SphI*, treated with alkaline phosphatase, and ligated with DNA fragments containing sequence from 4334<sup>th</sup> to the end of *gpmA* obtained through PCR amplification.

### **Expression and purification of proteins**

The *rho* gene was PCR amplified from genomic DNA and cloned between the *NdeI* and *XhoI* sites of pET-15b (Novagen, Germany) to generate pETRho. For the expression of Rho protein tagged with six histidine at the amino-terminus, BL21 (DE3)/pETRho cells were grown in LB medium

containing ampicillin (100  $\mu\text{g/ml}$ ) at 37 °C for 16 h. A 1:100 dilution of this culture was grown in fresh LB medium (50 ml), and cells were grown to an  $\text{OD}_{600}$  of 0.6 at 37 °C. IPTG (final concentration, 20  $\mu\text{M}$ ) was added, and the culture was grown for an additional 4 h. A total volume of 3 ml of the cells was pelleted and resuspended in 500  $\mu\text{l}$  binding buffer (Bioneer, Korea). Cells were disrupted by sonication (25% amplitude, 5 s on and 5 s off for 20 cycles). The next steps of protein purification were performed according to the manufacturer's recommendations (Bioneer, Korea). Briefly, 50  $\mu\text{l}$  of magnetic beads were equilibrated with 1 ml binding buffer with 5 min. The tube was placed on the magnetic stand. Cell pellets were centrifuged at 4°C, 12000  $\times g$  for 30 min, supernatants were collected and mixed with magnetic beads at room temperature (25°C) for 20 min. The tube was placed on the magnetic stand, and the supernatant was removed. 500  $\mu\text{l}$  Binding & Washing solution was added to the beads and vortexed for 10 s. Washing was repeated for three time. Finally, 100  $\mu\text{l}$  elution solution was added, mixed with tube rotator at room temperature (25°C) for 10 minutes. The tube was centrifuged for 5 s and the supernatant was collected. Protein concentration was determined by measuring  $A_{280}$  using NanoDrop spectrophotometer. NusA and NusG proteins were also purified as described for Rho.



### ***In silico* analysis of RIT and RDT distributions**

The RITs were predicted using the WebGeSTer database <sup>6</sup>. The regions between +1 to +270, which are relative to the stop codons of the terminal cistrons among the operons were analyzed. RNA sequences and secondary structures containing the following parameters were recognized as RITs: stem length 4-12 bp, loop length 3-8 bp, max mismatch 3 bp, cut-off  $\Delta G$  -12, hairpin followed by a 10 bp trail having >3 uridylates.

RDTs were analyzed in the regions between +1 to +700 relative to the stop codons of the terminal cistrons among the operons. The emboss freak program with a stepping value of 1 and an averaging window of 78 calculated the frequencies of cytidines and guanines residues (<http://emboss.bioinformatics.nl/cgi-bin/emboss/freak>). The regions which were longer than 78 bp, containing continuous C>G were identified as RDT.

### **Fig. S1**

**Schematic presentation of *pgal-gpmA* plasmid containing wild type *galETKM* and *gpmA* gene shown in blue and orange arrows, respectively.**

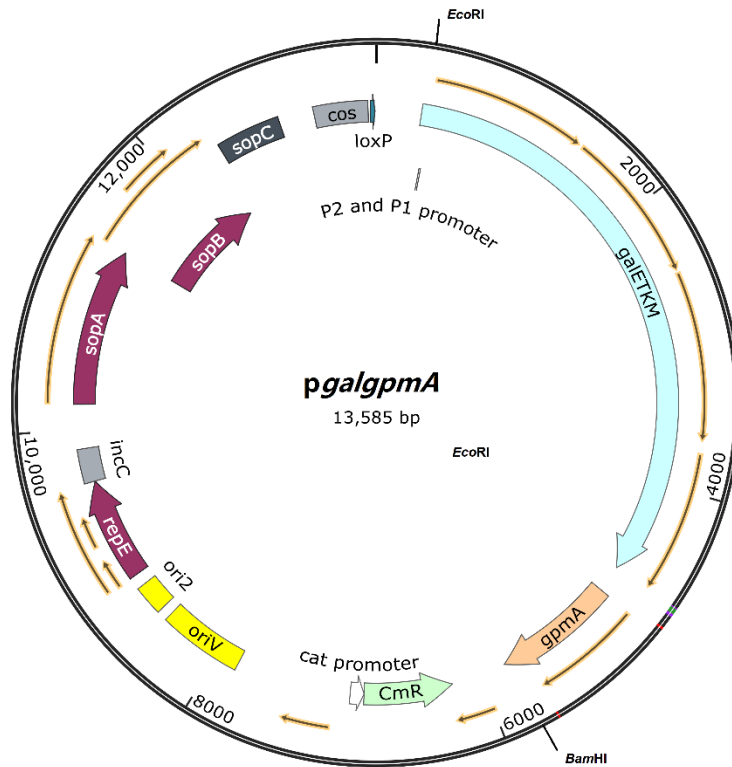

**Fig. S2**

**Top:** A Schematic presentation of WT and mutant *gal* mRNAs and the neighboring transcript, *gpmA* mRNA. The two tandem terminators of *gal*; intrinsic termination signal (the terminator hairpin) presented as a cyan hairpin structure, and Rho-termination signal (C-rich region) depicted as an orange line. The intrinsic termination signal of *gpmA* is presented as a black hairpin. Deleted sequences are crossed in red.

**Bottom:** Sequence presentation of functional regions at the end of *gal* and *gpmA* mRNAs. The intrinsic termination signal sequences are marked in cyan. The stem sequences are underlined. The C-rich Region are shown in

orange colors. Changed nucleotides are shown in red. The intrinsic terminator of *gpmA* is shown in blue, other functional sequences, such as translation stop codon of *galM*, translation start and stop codon of *gpmA* are shown in bold text.

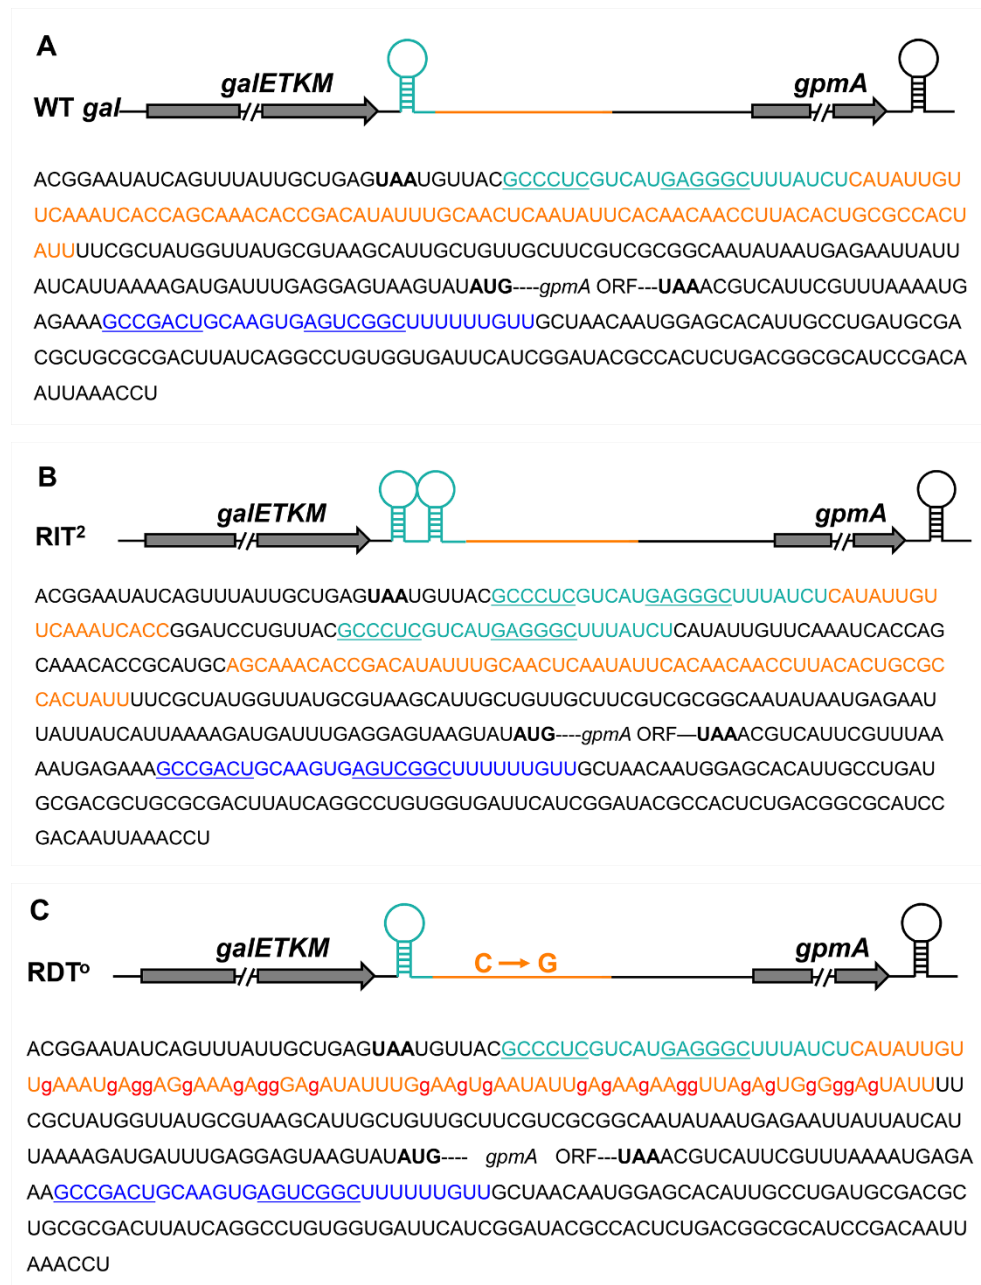

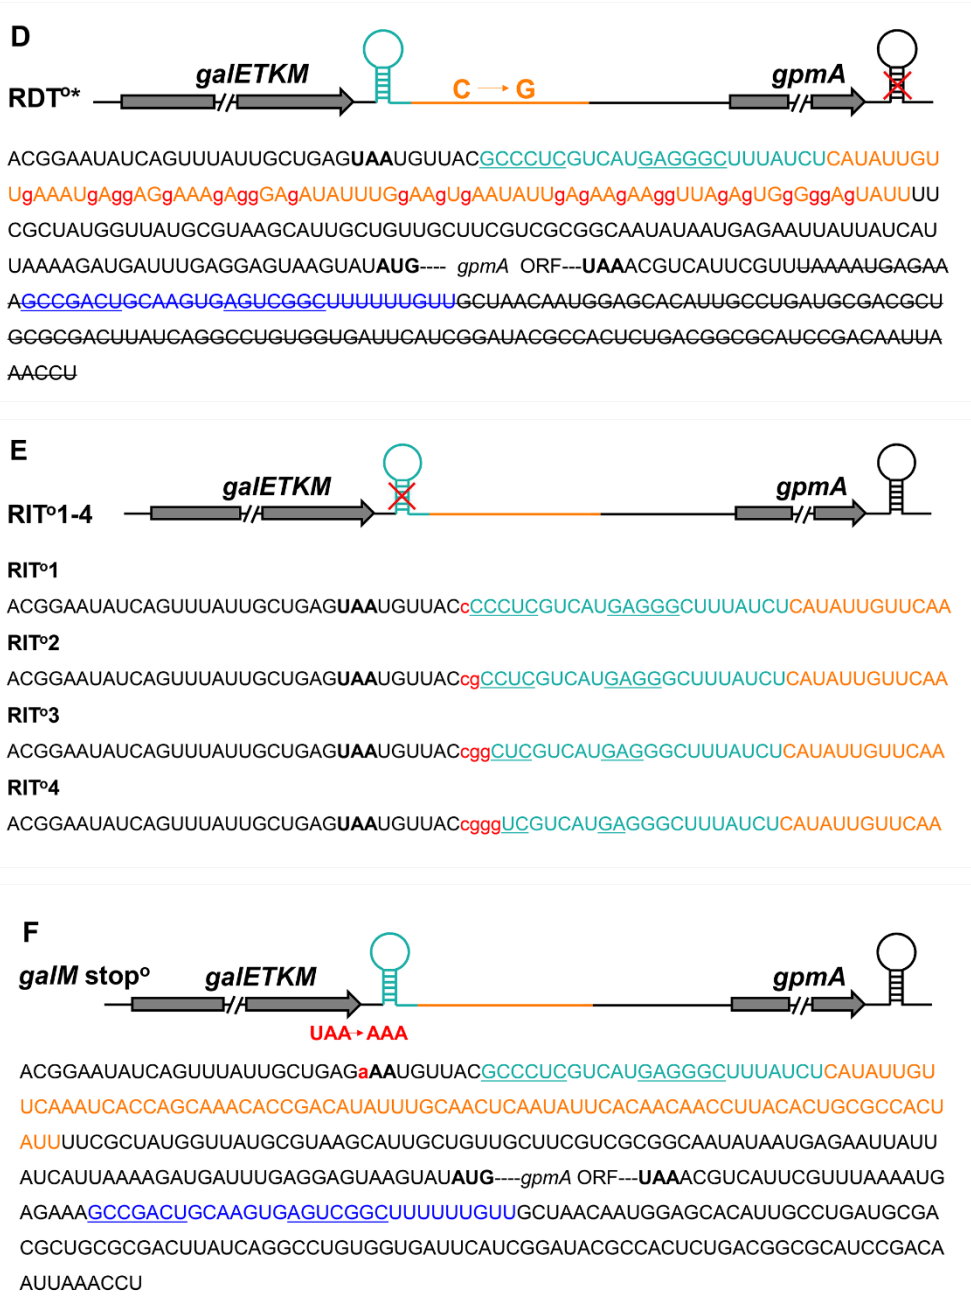

**Table S1. Primers list.**

| Primer name         | Primer sequences (5'→3')           | Usage                                                         |
|---------------------|------------------------------------|---------------------------------------------------------------|
| -73-EcoRI-for       | GGCGAATTCAATTCTTGTGTAAACGATT<br>CC | Cloning the <i>gal</i> operon and<br><i>gpmA</i> into pCC1BAC |
| <i>gpmA</i> -BamHI- | ATGCAGTAAGGATCCGTCGCGGGTAAG        | Cloning the <i>gal</i> operon and                             |

|               |                                   |                                                                    |
|---------------|-----------------------------------|--------------------------------------------------------------------|
| rev           | G                                 | <i>gpmA</i> into pCC1BAC                                           |
| 3RP           | AGCATGCGGCCGCTAAGAAC              | Revers transcription and<br>PCR for 3' RACE assay                  |
| M3            | TCCGCACGACGGCCTGAAAT              | PCR for 3' RACE assay                                              |
| M4240         | CGAAGAGTATTCCAGCCTG               | Primer extension for<br>3' RACE assay                              |
| RT-M-for2     | GAACCTTACGCCGACTGGCAAG            | Primer extension for RIT <sup>o</sup> 1-4<br>mutants 3' RACE assay |
| E1            | ATGAGAGTTCTGGTTACCGGTGGTA         | Northern blot analysis, the <i>galE</i><br>probe generation        |
| E2            | TGGGCTTTTTGCAGATCGGTGAGGA         | Northern blot analysis, the <i>galE</i><br>probe generation        |
| gal-2865-for  | CATGAACTGGACCCGATCGTGG            | Forward flanking primer<br>for PCR mutagenesis                     |
| gal-5615-rev  | CACCCCAGGCTTTACACTTTATGC          | Reverse flanking primer<br>for PCR mutagenesis                     |
| sphI-4334_For | CATGCATGCAGCAAACACCGACATATT<br>TG | RIT <sup>2</sup> plasmid construction                              |
| gmHMM1-for    | ATGTTACCCCCTCGTCATGAGGGC          | Mutagenic primer for RIT <sup>o</sup> 1<br>plasmid construction    |
| gmHMM2-for    | ATGTTACCGCCTCGTCATGAGGGC          | Mutagenic primer for RIT <sup>o</sup> 2<br>plasmid construction    |
| gmHMM3-for    | ATGTTACCGGCTCGTCATGAGGGC          | Mutagenic primer for RIT <sup>o</sup> 3<br>plasmid construction    |
| gmHMM4-for    | ATGTTACCGGGTCGTCATGAGGGC          | Mutagenic primer for RIT <sup>o</sup> 4                            |

|               |                                                                  |                                                                                |
|---------------|------------------------------------------------------------------|--------------------------------------------------------------------------------|
|               |                                                                  | plasmid construction                                                           |
| gmCRR-for     | GGAGATATTTGGAAGTGAATATTGA<br>GAAGAAGGTTAGAGTGGGGGAGTA<br>TTTTCG  | RDT <sup>o</sup> plasmid construction                                          |
| gmCRR-rev     | CTTCCAAATATCTCCCTCTTTCCTCC<br>TCATTTCAACAATATGAGATAAAGC<br>CCTC  | RDT <sup>o</sup> plasmid construction                                          |
| gmCRR*-rev    | CGGGATCCAACGAATGACGTTTACT<br>T                                   | Mutagenic primer for RDT <sup>o*</sup><br>plasmid construction                 |
| gmNS-for      | GCTGAGAAATGTTACGCCCTCGTC                                         | Mutagenic primer for <i>galM</i> sto<br>p <sup>o</sup><br>plasmid construction |
| rnbKO-for     | TGTCAGCCGCTCTAATGGCCACCAA<br>AATAGACAATTGTGTAGGCTGGAGC<br>TGCTTC | Chromosomal <i>RNaseII</i> ( <i>rnb</i> )<br>deletion                          |
| rnbKO-rev     | ACGGCCCATCCATGAGGAATGGGCC<br>GTGAAAGGAGACTGTCAAACATGA<br>GAATTAA | Chromosomal <i>RNaseII</i> ( <i>rnb</i> )<br>deletion                          |
| galE-EcoRI    | GGATATCGTGGACTCTATCGCTATGTC                                      | Chromosomal <i>gal</i> operon deletion                                         |
| galM-HpaI     | CGGTTAACAGCCATATACTTACTCCTC                                      | Chromosomal <i>gal</i> operon deletion                                         |
| rnbKO-con-for | CAGATTCGCGTAAAACACTGTCAG                                         | Chromosomal <i>RNaseII</i> ( <i>rnb</i> )<br>deletion                          |
| rnbKO-con-rev | GGAAATAAACGGCCCATCCATG                                           | Chromosomal <i>RNaseII</i> ( <i>rnb</i> )<br>deletion                          |

---

## Reference

1. Datsenko, K.A. & Wanner, B.L. One-step inactivation of chromosomal genes in *Escherichia coli* K-12 using PCR products.

- Proc Natl Acad Sci U S A* **97**, 6640-5 (2000).
2. Yu, D. et al. An efficient recombination system for chromosome engineering in *Escherichia coli*. *Proc Natl Acad Sci U S A* **97**, 5978-83 (2000).
  3. Sharan, S.K., Thomason, L.C., Kuznetsov, S.G. & Court, D.L. Recombineering: a homologous recombination-based method of genetic engineering. *Nat Protoc* **4**, 206-23 (2009).
  4. Wang, X. et al. Expression of each cistron in the *gal* operon can be regulated by transcription termination and generation of a *galk*-specific mRNA, mK2. *J Bacteriol* **196**, 2598-606 (2014).
  5. Tyagi, R., Lai, R. & Duggleby, R.G. A new approach to 'megaprimer' polymerase chain reaction mutagenesis without an intermediate gel purification step. *BMC Biotechnol* **4**, 2 (2004).
  6. Mitra, A., Kesarwani, A.K., Pal, D. & Nagaraja, V. WebGeSTer DB-  
-a transcription terminator database. *Nucleic Acids Res* **39**, D129-35 (2011).
